# Supplementary material
Source: publisher figshare collection journal article supplement (https://future-science-group.figshare.com/articles/dataset/_/21915420)
Supplement: Supplementary file 1 [file 1]

## Sheet: Sheet1
#Supplementary Table 2: Significant expanded TCR clones specific to neoantigens
MANA	clone	count	freq	p.value	odds.ratio	q.value
MANA2	CASSYTGFDGYTF	68958	0.0202	<1.00E-06	8.58	<1.00E-06
MANA2	CSGKGSGYYNEQFF	24293	0.00711	<1.00E-06	3.19	<1.00E-06
MANA3	CAISVGGADNEQFF	6821	0.00272	<1.00E-06	14.14	<1.00E-06
MANA3	CASRFPGNQPQHF	26159	0.0104	<1.00E-06	592.69	<1.00E-06
MANA3	CASSDALAGGKNIQYF	5278	0.0021	<1.00E-06	3.59	<1.00E-06
MANA3	CASSSRVNGAEAFF	34508	0.0137	<1.00E-06	2.16	<1.00E-06
MANA3	CASSYFSEAFF	3092	0.00123	<1.00E-06	22.06	<1.00E-06
MANA3	CSAKGQGSNYGYTF	15738	0.00627	<1.00E-06	6.44	<1.00E-06
MANA3	CSALAGGSTGELFF	10386	0.00414	<1.00E-06	59.54	<1.00E-06
MANA5	CASSFTRGGGNQPQHF	7216	0.00292	<1.00E-06	3.64	<1.00E-06
MANA5	CASSYSGFTEAFF	158165	0.064	<1.00E-06	68.51	<1.00E-06
MANA5	CSAMGALSYNEQFF	21525	0.00871	<1.00E-06	20.48	<1.00E-06
MANA6	CASSIGGVDTQYF	6443	0.00227	<1.00E-06	2.79	<1.00E-06
MANA6	CASSIPFAFSSYNEQFF	20319	0.00715	<1.00E-06	115.24	<1.00E-06
MANA6	CASSPRTGEVETQYF	44159	0.0155	<1.00E-06	25.36	<1.00E-06
MANA6	CASSQDEGLYEKLFF	8122	0.00286	<1.00E-06	128.29	<1.00E-06
MANA7	CASSLLTGTTEAFF	5635	0.00166	<1.00E-06	7.91	<1.00E-06
MANA7	CASSLVMRRLGTEAFF	4935	0.00146	<1.00E-06	3.61	<1.00E-06
MANA7	CSARAFSQAGREDIQYF	9450	0.00279	<1.00E-06	2.14	<1.00E-06
MANA7	CSARGTRSYEQYF	21448	0.00633	<1.00E-06	4.3	<1.00E-06
MANA9	CASSLSGWEFEQYF	294900	0.0893	<1.00E-06	8.86	<1.00E-06
MANA9	CASSQISNYGYTF	10964	0.00332	<1.00E-06	2.8	<1.00E-06
MANA9	CSAAPQMNTEAFF	25191	0.00763	<1.00E-06	19.65	<1.00E-06
MANA12	CASSPGFSGELFF	5215	0.00126	<1.00E-06	19.51	<1.00E-06
MANA13	CAISAPQGVTTYEQYF	8990	0.00232	<1.00E-06	2.41	<1.00E-06
MANA13	CASSLSSGYEAFF	4230	0.00109	<1.00E-06	10.07	<1.00E-06
MANA13	CASSTGLSNTEAFF	25968	0.00669	<1.00E-06	2.37	<1.00E-06
MANA13	CASSTLGLADEQFF	10904	0.00281	<1.00E-06	2.51	<1.00E-06
MANA13	CSARDLYGQPQHF	7590	0.00196	<1.00E-06	3.07	<1.00E-06
MANA15	CSARDLGQTYGYTF	9959	0.00317	<1.00E-06	8.45	<1.00E-06
MANA16	CASRRTGFRTEAFF	116894	0.0432	<1.00E-06	15.14	<1.00E-06
